# Supplementary material for: Fast and selective detection of volatile organic compounds using a novel pseudo spin-ladder compound CaCu2O3
Source: Royal Society of Chemistry journal article supplement (doi:10.1039/d0ma00375a), 2020-01-01
Supplement: d0ma00375a1.pdf [file d0ma00375a1.pdf]

**Fast and selective detection of volatile organic compounds using a novel  
pseudo spin-ladder compound  $\text{CaCu}_2\text{O}_3$**

N. Lavanya<sup>a</sup>, S.G. Leonardi<sup>b</sup>, N. Donato<sup>b</sup>, G. Neri<sup>b\*</sup>, G. Veerapandi<sup>a</sup>, C. Sekar<sup>a\*</sup>

<sup>a</sup>*Department of Bioelectronics and Biosensors, Alagappa University, Karaikudi-630 004, India*

<sup>b</sup>*Department of Engineering, University of Messina, Messina-Italy*

**SUPPLEMENTARY FILE**

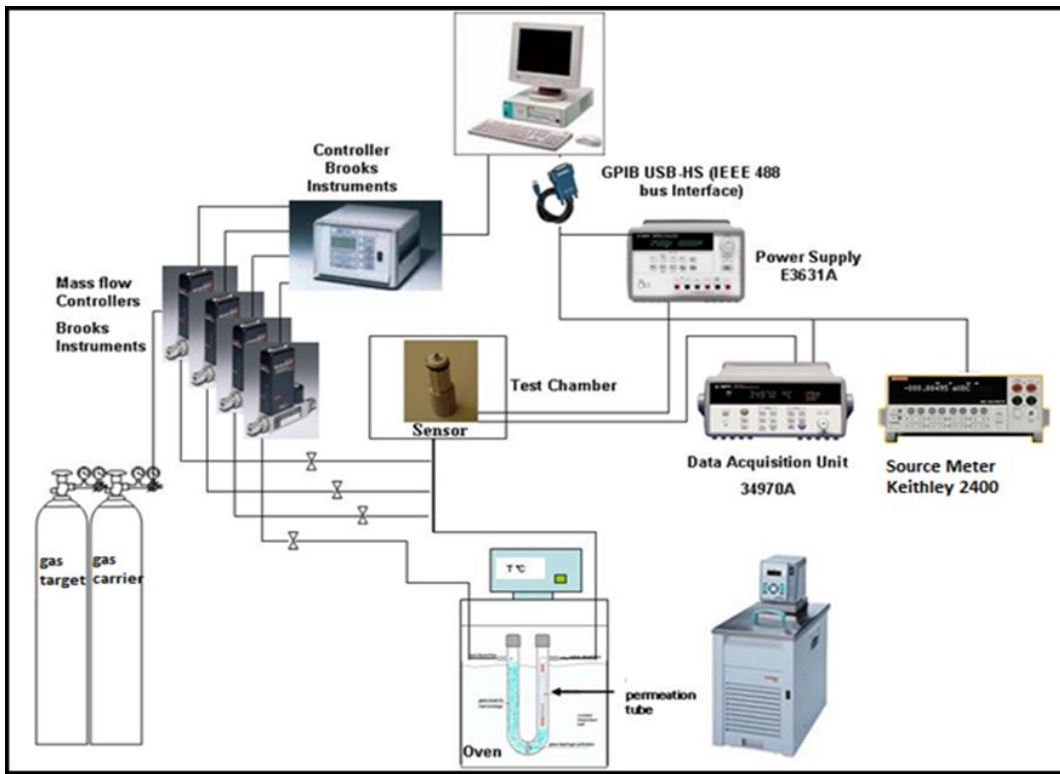

Fig. 1 Schematic diagram of the gas sensing setup used.
